# Supplementary material for: Structural reconstruction and visible-light absorption versus internal electrostatic field in two-dimensional GaN–ZnO alloys
Source: Royal Society of Chemistry journal article supplement (doi:10.1039/d1nr02548a), 2021-01-01
Supplement: d1nr02548a1.pdf [file d1nr02548a1.pdf]

**Supplementary Materials for "Structural reconstruction and visible-light absorption versus internal electrostatic field in two-dimensional GaN-ZnO alloys"**

Hanpu Liang<sup>1</sup> and Yifeng Duan<sup>1, a)</sup>

*School of Materials and Physics, China University of Mining and Technology, Xuzhou, Jiangsu 221116, China*

(Dated: 10 June 2021)

---

<sup>a)</sup>Electronic mail: [yifeng@cumt.edu.cn](mailto:yifeng@cumt.edu.cn)

TABLE S1. Structure parameters of bulk haeckelite and wurtzite.

| Structure  | Phase    | Parameters                     | Atom   | x    | y    | z    |
|------------|----------|--------------------------------|--------|------|------|------|
| Haeckelite | $Pmn2_1$ | $a = 3.24$                     | Ga(2a) | 0.50 | 0.18 | 0.44 |
|            |          | $b = 5.54$                     | N(2a)  | 0.50 | 0.82 | 0.44 |
|            |          | $c = 5.61$                     | Zn(2a) | 0.50 | 0.81 | 0.08 |
|            |          | $\alpha = \beta = \gamma = 90$ | O(2a)  | 0.00 | 0.69 | 0.91 |
| Wurtzite   | $P3m1$   | $a = b = 3.24$                 | Ga(1a) | 0.00 | 0.00 | 0.56 |
|            |          | $c = 5.30$                     | N(1a)  | 0.00 | 0.00 | 0.93 |
|            |          | $\alpha = \beta = 90$          | Zn(1c) | 0.67 | 0.33 | 0.46 |
|            |          | $\gamma = 120$                 | O(1c)  | 0.67 | 0.33 | 0.08 |

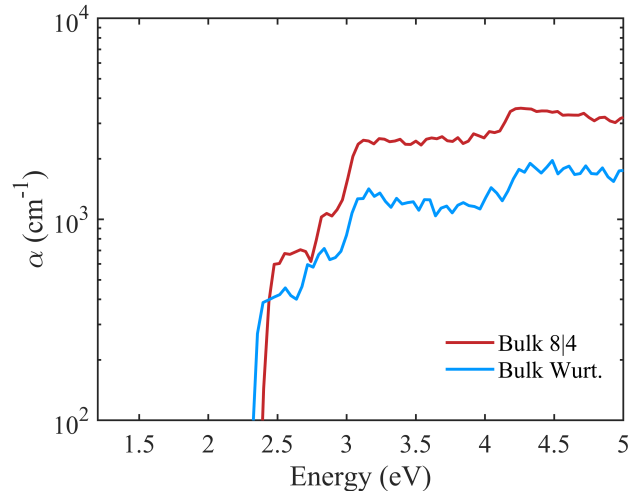

Fig. S1. HSE06 optical absorption coefficients for the bulk 8|4 and wurtzite phases by PWmat code.

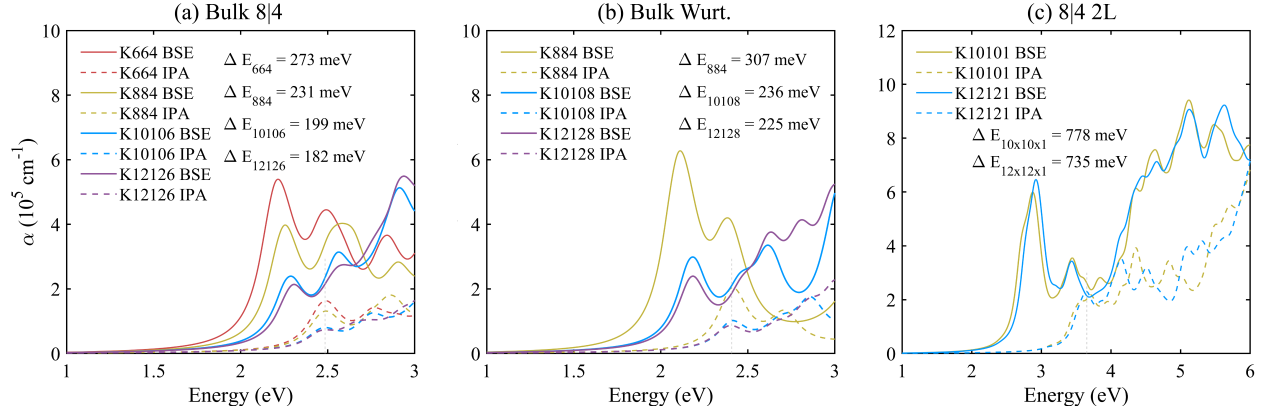

Fig. S2. The optical absorption spectra with (solid line) and without (dashed line) the electron-hole interaction in (a) bulk 8|4, (b) bulk wurtzite, and (c) two-layer 8|4 phases at the  $G_0W_0$  approximation.

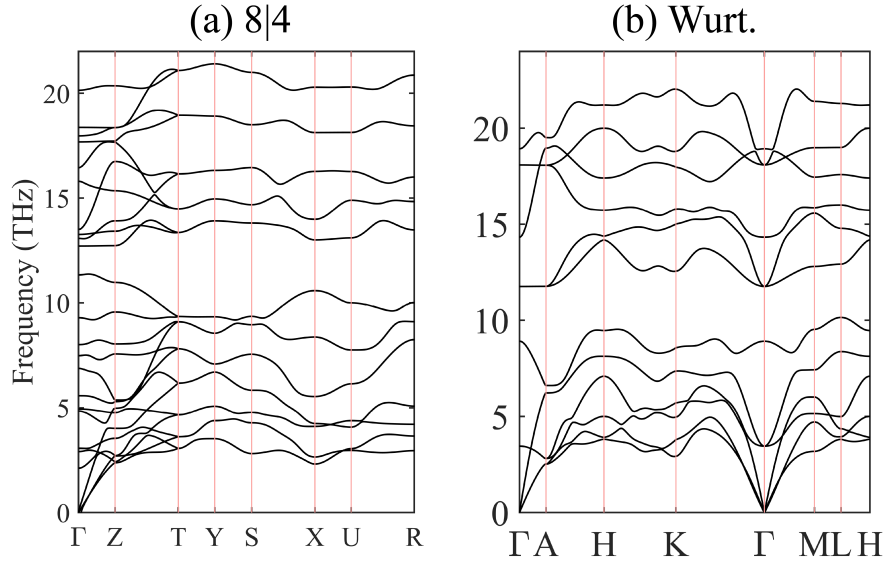

Fig. S3. Phonon spectra of bulk (a) haeckelite 8|4 and (b) wurtzite  $P3m1$   $(\text{GaN})_1(\text{ZnO})_1$  alloys at ambient pressure.

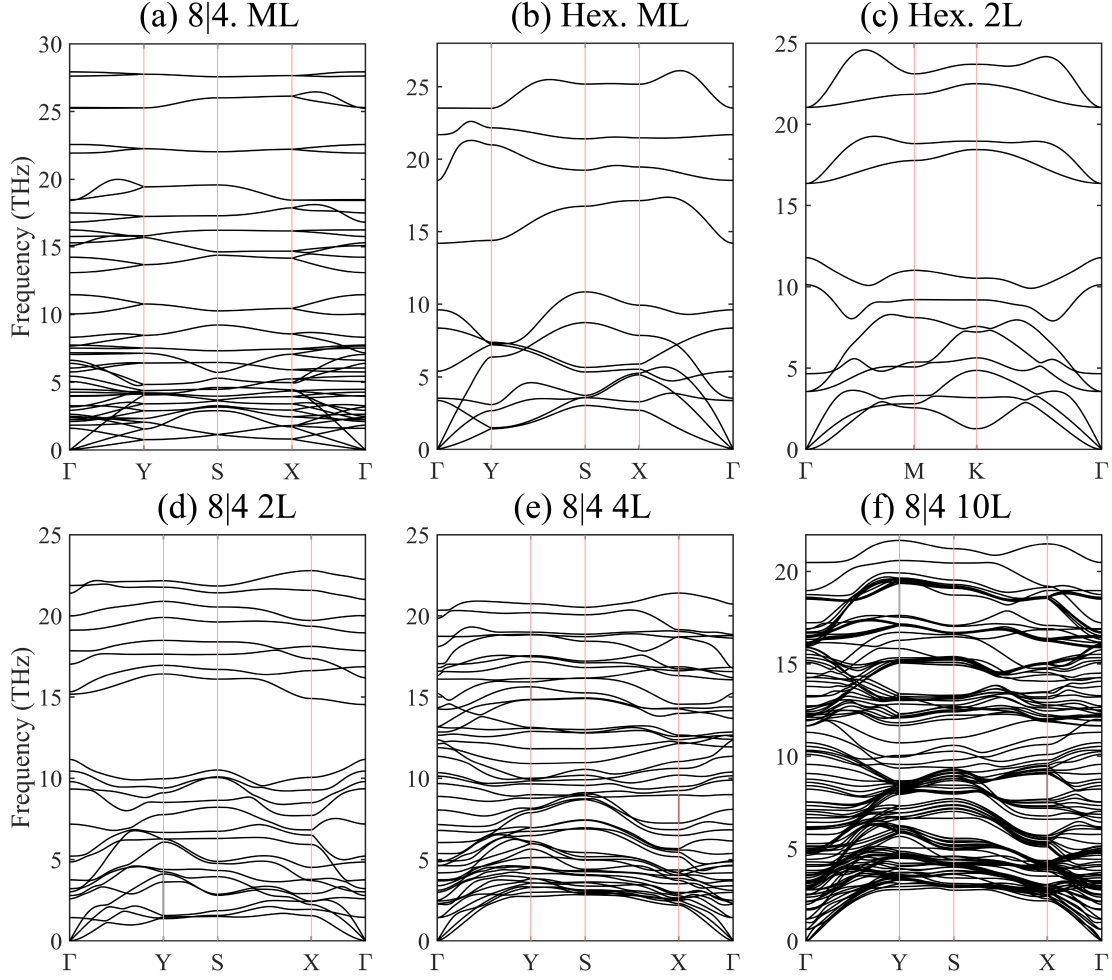

Fig. S4. Phonon spectra of (a) monolayer 8|4, (b) monolayer hexagonal, (c) two-layer hexagonal, (d) two-layer 8|4, (e) four-layer 8|4 and (f) ten-layer 8|4 configurations.

TABLE S2. Structural stability of two-, four- and six-layer wurtzite configurations with different stacking modes, where  $\Delta E = E_{\text{Hex./Wurt.}} - E_{8|4}$ .

|    | Configs./Stacking | $E$ (eV/atom) | $\Delta E$ (meV/atom) |
|----|-------------------|---------------|-----------------------|
| 2L | 8 4               | -5.026        | 0                     |
|    | Hex./AA           | -4.973        | 53                    |
|    | Hex./AB-1         | -4.966        | 60                    |
|    | Hex./AB-2         | -4.969        | 57                    |
| 4L | 8 4               | -5.111        | 0                     |
|    | Wurt./AA          | -4.968        | 143                   |
|    | Wurt./ABAB        | -4.958        | 153                   |
| 6L | 8 4               | -5.152        | 0                     |
|    | Wurt./AA          | -5.036        | 116                   |
|    | Wurt./ABBABB      | -5.030        | 122                   |

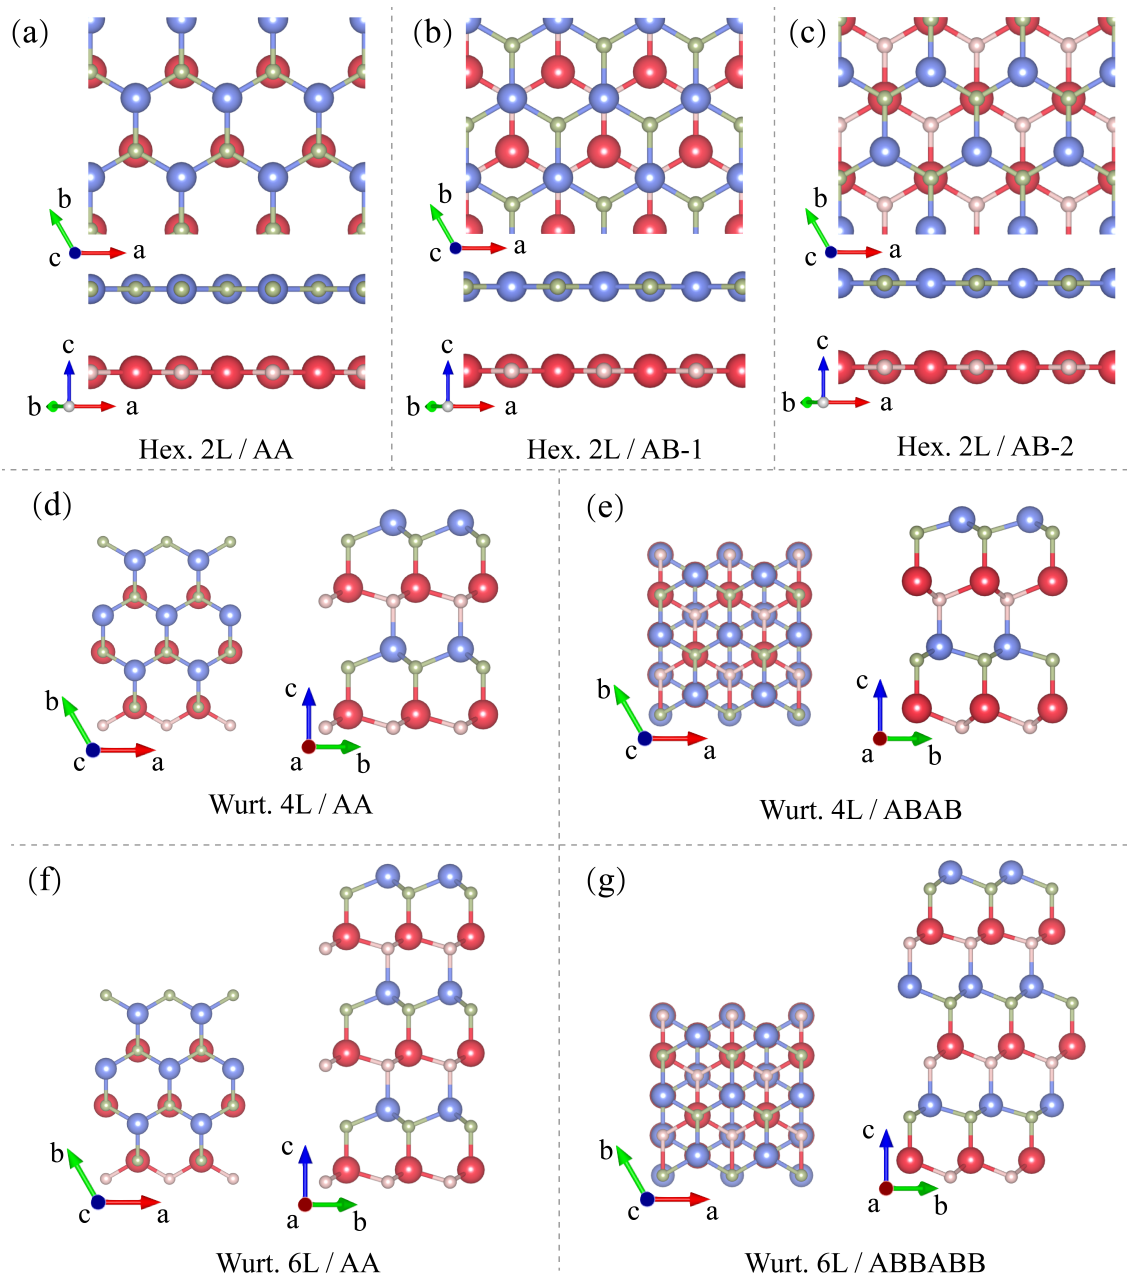

Fig. S5. Two-, four- and six-layer wurtzite configurations with different stacking modes.

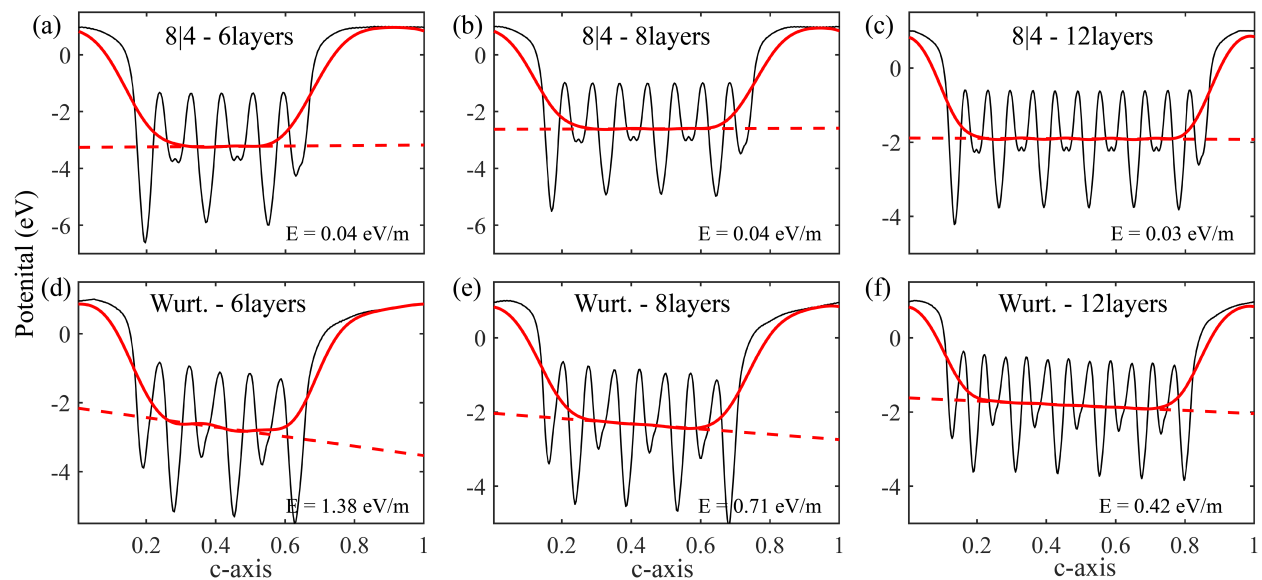

Fig. S6. Planar- (black line) and macroscopic-average (red line) internal electrostatic potentials along the  $c$  axis for six-, eight- and twelve-layer thicknesses in 8|4 and wurtzite configurations, respectively.

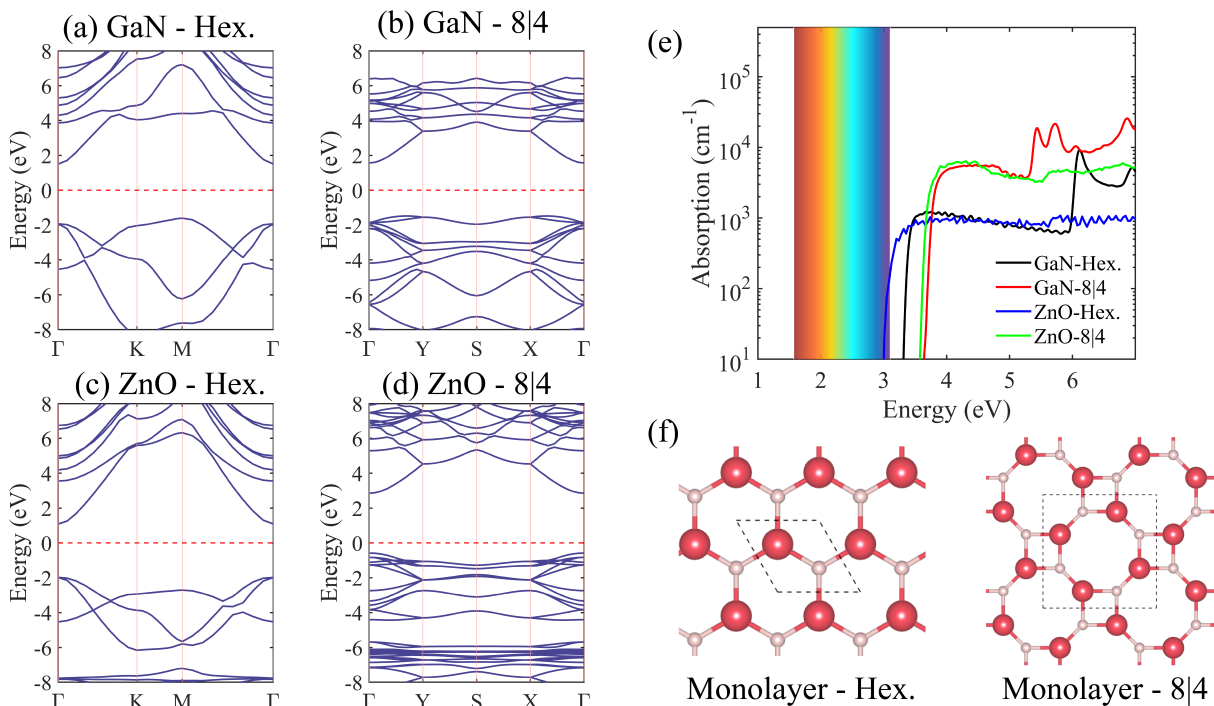

Fig. S7. HSE06 electronic band structures of monolayer planar hexagonal and 8|4 configurations: (a) hexagonal GaN, (b) 8|4 GaN, (c) hexagonal ZnO, (d) 8|4 ZnO. (e) Optical absorption coefficients for monolayer GaN and ZnO with hexagonal and 8|4 configurations. (f) Views of monolayer hexagonal and 8|4 configurations.

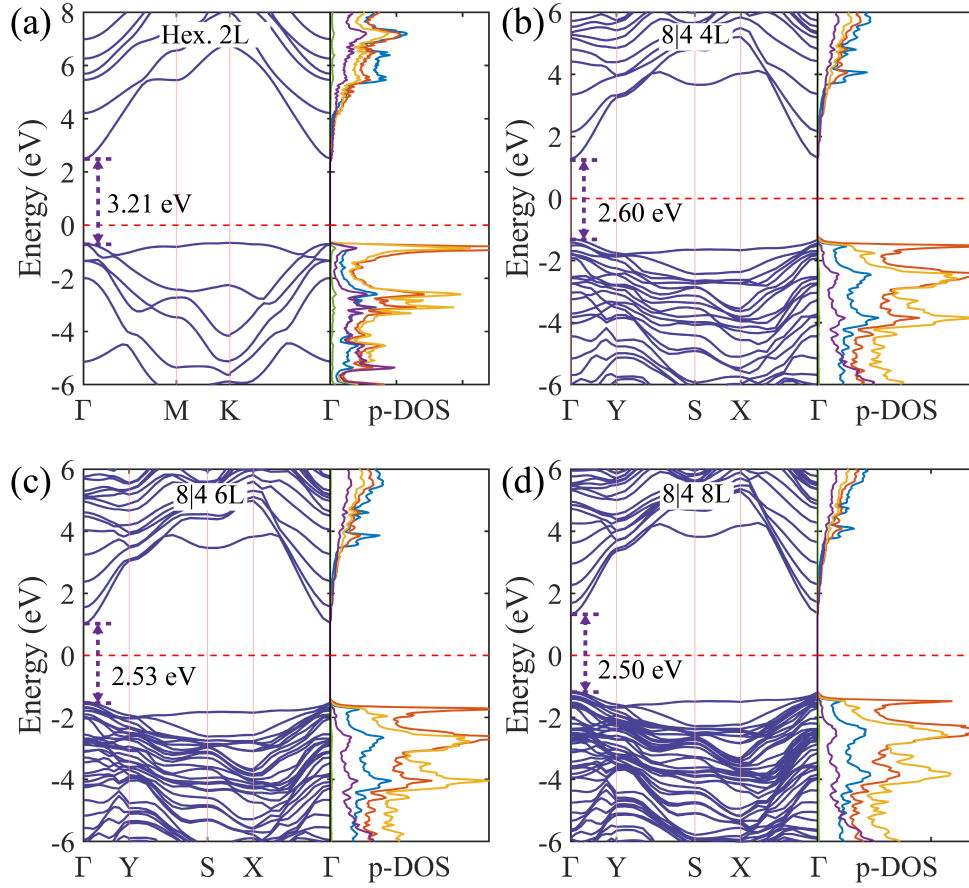

Fig. S8. HSE06 electronic band structures as well as densities of state of (a) two-layer hexagonal, (b) four-layer 8|4, (c) six-layer 8|4 and (d) eight-layer 8|4 configurations.

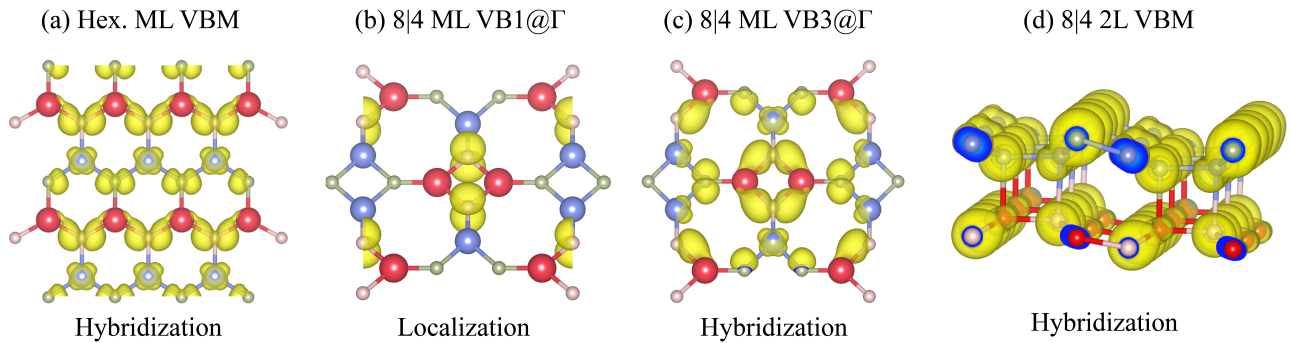

Fig. S9. Spatial valence band edge state distributions of (a) monolayer hexagonal, (b) and (c) monolayer 8|4, and (d) two-layer 8|4 configurations.

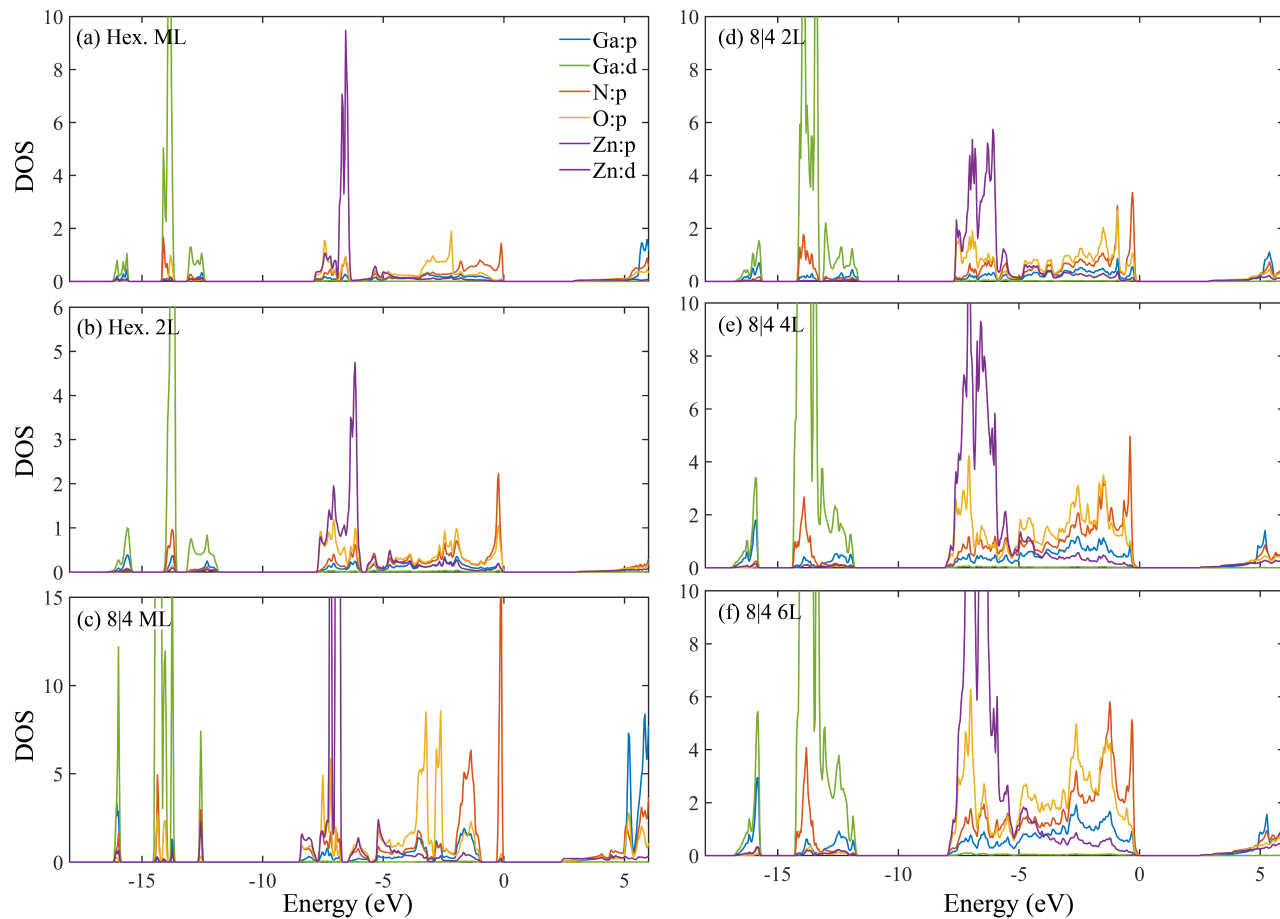

Fig. S10. HSE06 electronic densities of state of 2D configurations: (a) hexagonal monolayer, (b) hexagonal two layers, (c) 8|4 monolayer, (d) 8|4 two layers, (e) 8|4 four layers, and (f) 8|4 six layers.



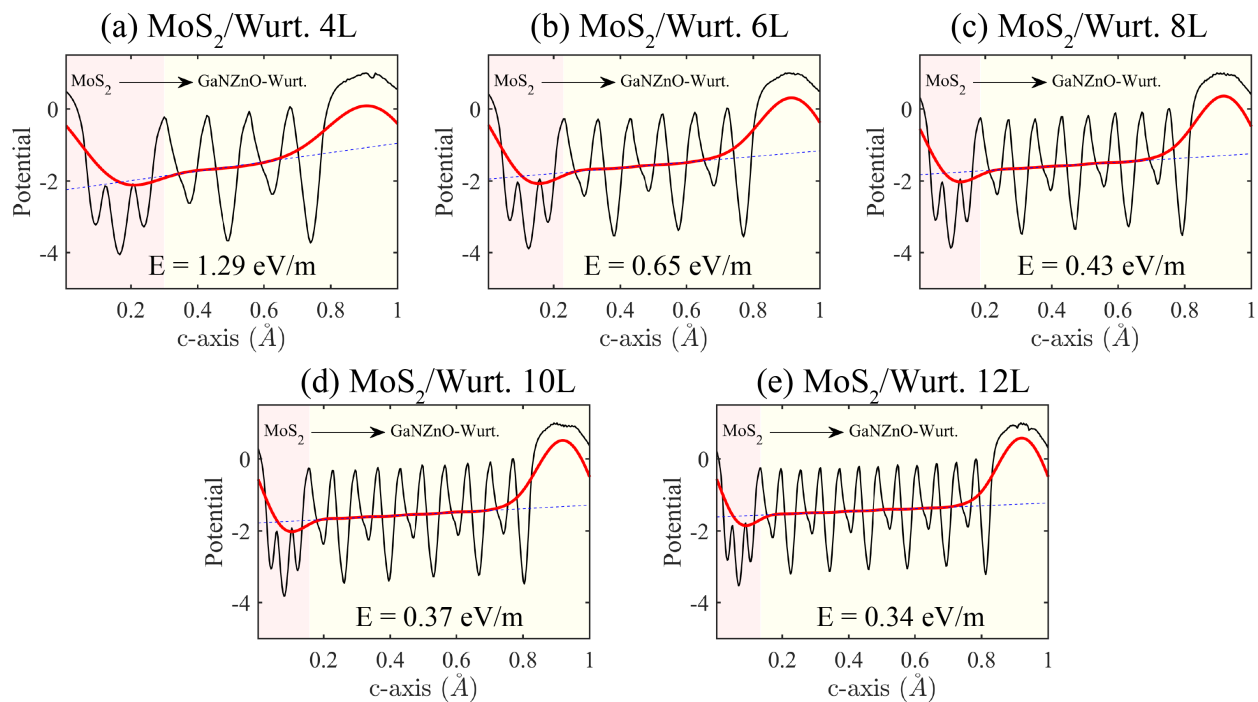

Fig. S11. Internal electrostatic potentials for MoS<sub>2</sub>-based heterostructures with (a) four-, (b) six-, (c) eight-, (d) ten-, and (e) twelve-layer wurtzite configurations.

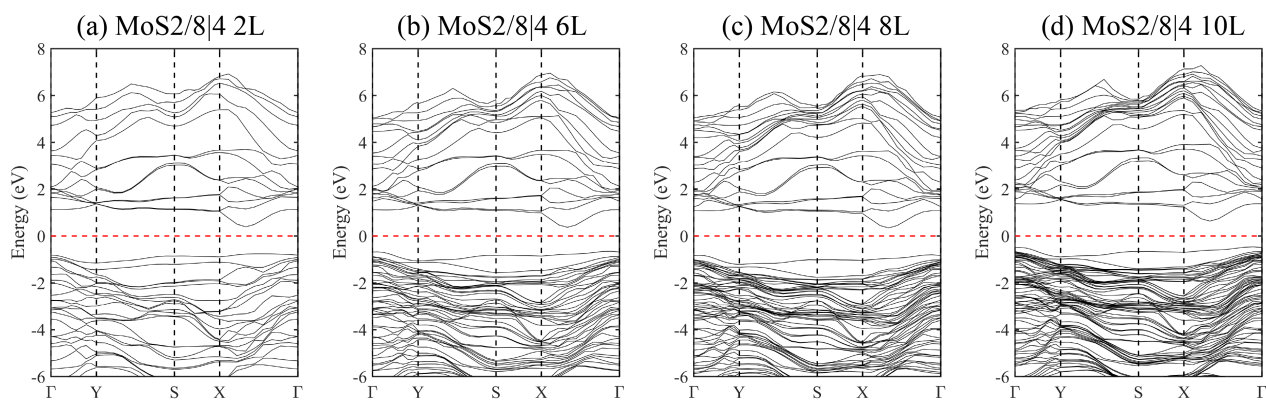

Fig. S12. HSE06 electronic band structure of MoS<sub>2</sub>-based heterostructures with (a) two-, (b) six-, (c) eight-, and (d) ten-layer 8|4 configurations.
